# Supplementary material for: A facile one-pot hydrothermal synthesis of Co9S8/Ni3S2 nanoflakes for supercapacitor application
Source: Royal Society of Chemistry journal article supplement (doi:10.1039/c6ra04857a), 2016-01-01
Supplement: c6ra04857a1.pdf [file c6ra04857a1.pdf]

**One-step synthesis of Co<sub>9</sub>S<sub>8</sub>/Ni<sub>3</sub>S<sub>2</sub>nanoflakes on nickel foam for high-performance supercapacitors**

Xiuhua Wang<sup>a\*</sup>, Jie Gao<sup>a</sup>, Xiaoxiu Wu<sup>a</sup>, Xiuqin Wang<sup>b</sup>, Ronghui Que<sup>a\*</sup>, Konglin Wu<sup>a</sup>

<sup>a</sup>Anhui Key Laboratory of Molecule-Based Materials, The Key Laboratory of Functional Molecular Solids, Ministry of Education, College of Chemistry and Materials Science, Anhui Normal University, Wuhu 241000, China

<sup>b</sup>Shandong Provincial Cancer Hospital and Institute, Jinan 250117, China

\* To whom correspondence should be addressed:

E-mail: xhwang@mail.ahnu.edu.cn; qrhui123@mail.ahnu.edu.cn

## Figures Supporting

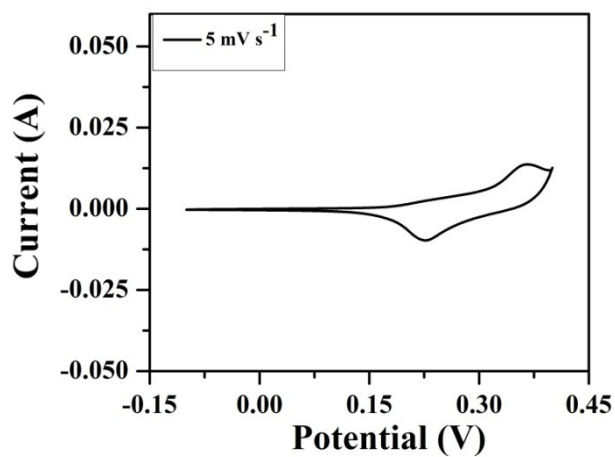

Fig. S1 CV curve of  $\text{Co}_9\text{S}_8/\text{Ni}_3\text{S}_2$  electrode at a scan rate of  $5 \text{ mV s}^{-1}$  in 3 M NaOH.

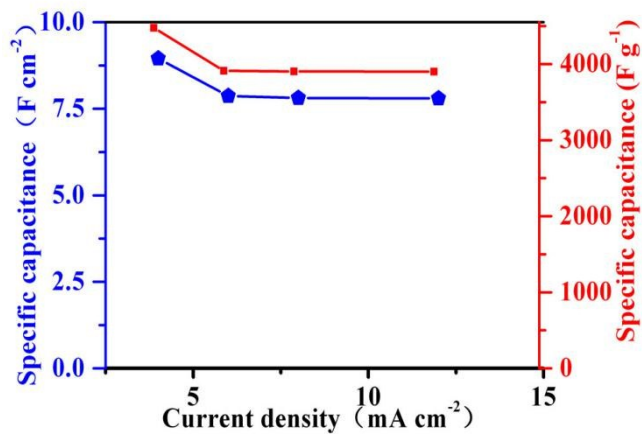

Fig. S2 The specific capacitance as a function of the current densities of the  $\text{Co}_9\text{S}_8/\text{Ni}_3\text{S}_2$  electrode.

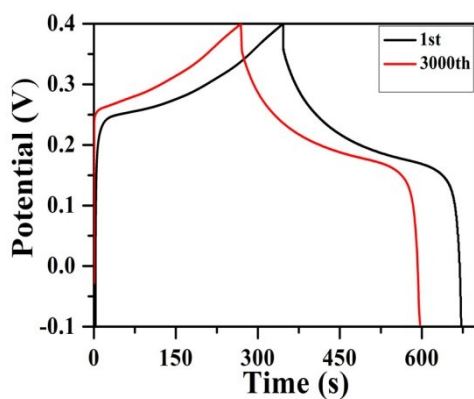

Fig. S3 The 1st and 3000th charge/discharge curves of  $\text{Co}_9\text{S}_8/\text{Ni}_3\text{S}_2$

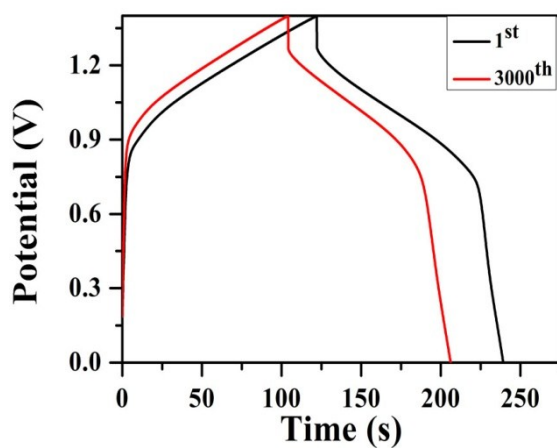

Fig. S4 The 1st and 3000th charge/discharge curves of  $\text{Co}_9\text{S}_8/\text{Ni}_3\text{S}_2//\text{C}$  asymmetric device.

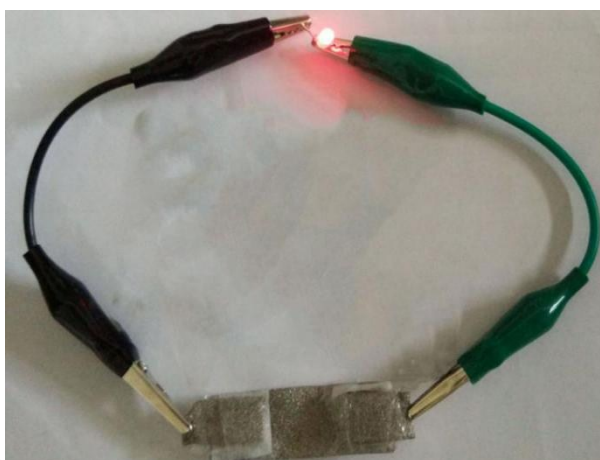

Fig. S5 Photograph of a red LED lighted up by three  $\text{Co}_9\text{S}_8/\text{Ni}_3\text{S}_2$  devices in series.
